# Supplementary material for: Enhancing Chemotherapy Safety: Impact of Simulation on Staff Nurses' Knowledge and Clinical Skills – A Time Series Approach
Source: Research Square preprint supplement (doi:10.21203/rs.3.rs-7430579/v1), 2025-11-10
Supplement: Supplementary file 1 [file e7cf48b0eb25756691e9e0c3.docx]

**Table no-1. Description of demographic variables**

N=30

| Demographic variables | | F | % |
| --- | --- | --- | --- |
| Age in years | 21 to 25 | 14 | 46.7% |
| 26 to 30 | 9 | 30.0% |
| 31 to 35 | 6 | 20.0% |
| 36 and above | 1 | 3.3% |
| Sex | Male | 4 | 13.3% |
| Female | 26 | 86.7% |
| Type of position | Staff nurse | 30 | 100.0% |
| Ward Incharge | 0 | 0.0% |
| Education status | GNM | 21 | 70.0% |
| BS.c Nursing | 9 | 30.0% |
| PBBS.c Nursing | 0 | 0.0% |
| MS.c Nursing | 0 | 0.0% |
| Year of Experience | 1 to 2 year | 9 | 30.0% |
| 3 to 4 year | 3 | 10.0% |
| 5 to 6 year | 9 | 30.0% |
| 7 year and above | 9 | 30.0% |
| Attended CNE | No | 30 | 100.0% |

**Table no- 2. Description of level of clinical competency**

N=30

| **Level of clinical competency** | **f** | **%** |
| --- | --- | --- |
| **Pre-test** |  |  |
| Advance Beginner (0 – 10) | 12 | 40.0% |
| Competent (11 – 20) | 18 | 60.0% |
| Expert (21 – 30) | 0 | 0.0% |
| **Post-test I** |  |  |
| Advance Beginner (0 – 10) | 0 | 0.0% |
| Competent (11 – 20) | 25 | 83.3% |
| Expert (21 – 30) | 5 | 16.7% |
| **Post-test II** |  |  |
| Advance Beginner (0 – 10) | 0 | 0.0% |
| Competent (11 – 20) | 8 | 26.7% |
| Expert (21 – 30) | 22 | 73.3% |

**Table no- 3. Description of level of knowledge**

N=30

| **Level of Knowledge** | f | % |
| --- | --- | --- |
| **Pre-test** |  |  |
| Average (0–10) | 17 | 56.7% |
| Moderate (11–20) | 13 | 43.3% |
| Good (21–30) | 0 | 0.0% |
| **Post-test I** |  |  |
| Average (0–10) | 0 | 0.0% |
| Moderate (11–20) | 28 | 93.3% |
| Good (21–30) | 2 | 6.7% |
| **Post-test II** |  |  |
| Average (0–10) | 0 | 0.0% |
| Moderate (11–20) | 15 | 50.0% |
| Good (21–30) | 15 | 50.0% |

**Table no- 4. Comparison of simulation training on knowledge on safe handling of chemotherapeutic drugs among staff nurses**

|  | | Mean± SD | f value | p value |
| --- | --- | --- | --- | --- |
| Group | pre tset | 11.10 ± 2.48 | 2005.371 | 0.0001*** |
| post test 1 | 17.30 ± 2.17 |
| post test II | 20.10 ± 1.79 |

***- very highly significant at 0.05 level of significance

**Table no- 5. Comparison of simulation training on clinical competency on safe handling of chemotherapeutic drugs among staff nurses**

N=30

|  | | Mean ± SD | f value | p value |
| --- | --- | --- | --- | --- |
|  | |  |  |  |
| Group | pre tset | 11.50 ± 2.90 | 1701.132 | 0.0001*** |
| post test 1 | 25.53 ± 2.64 |
| post test II | 29.40 ± 0.77 |

***- very highly significant at 0.05 level of significance

**Table no- 6. Correlation between pre-test knowledge and clinical competency**

N=30

| Variables | r | p |
| --- | --- | --- |
| Knowledge & Clinical competency | -.110 | 0.564 |

r = Pearson correlation coefficient; p = significance value. Correlations are considered significant at p < 0.05.
